# Supplementary material
Source: publisher figshare collection journal article supplement (https://diabetesjournals.figshare.com/articles/dataset/_/12185469)
Supplement: Supplementary file 1 [file 1]

### **Online Supplementary Materials**

1. Supplementary Figure 1. Flowchart of the analysis
2. Supplementary Table 1. Definitions of 6 ideal cardiovascular health metrics in participants without diabetes at baseline
3. Supplementary Table 2. RRs (95% CIs) for incident type 2 diabetes according to famine exposure in early life among 77925 participants
4. Supplementary Table 3. Multivariable-adjusted RRs (95% CIs) for incident type 2 diabetes according to famine exposure and combined ICVHMs
5. Supplementary Table 4. Multivariable-adjusted RRs (95% CIs) for incident type 2 diabetes according to famine exposure and combined ICVHMs by multiple testing via FDR
6. Supplementary Table 5. Multivariable-adjusted ORs (95% CIs) for type 2 diabetes according to famine exposure and combined ICVHMs with further adjustment of area (rural/urban), marriage status, occupation, economic status.
7. Supplementary Table 6. Age-balanced analysis of the ICVHMs' influence on famine exposure and diabetes risk.

Supplementary Figure 1. Participant Flow Diagram of the China Cardiometabolic Disease and Cancer Cohort (4C) Study

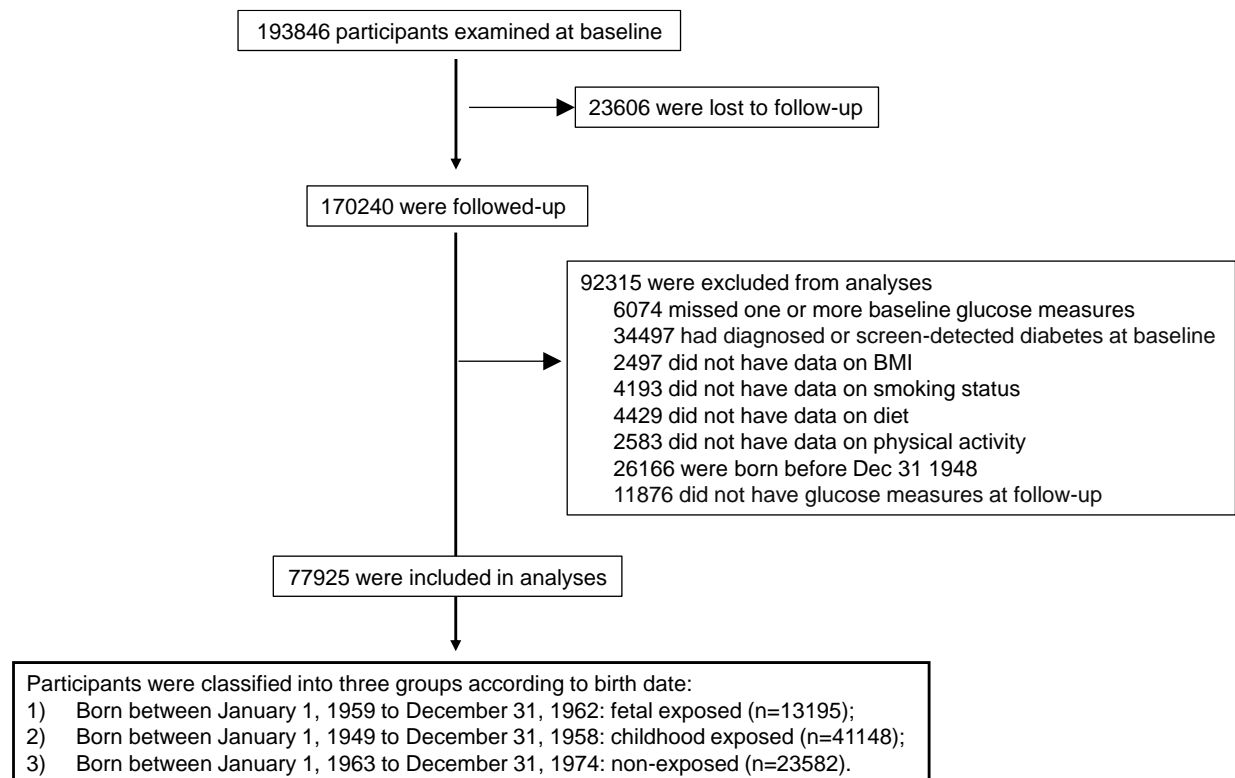

Supplementary Table 1. Definitions of 6 ideal cardiovascular health metrics in participants without diabetes at baseline <sup>a</sup>

| <b>Cardiovascular health metrics</b> | <b>Ideal level</b>                                                                                                                                                          |
|--------------------------------------|-----------------------------------------------------------------------------------------------------------------------------------------------------------------------------|
| Smoking                              | Never or quit >12 months                                                                                                                                                    |
| Body mass index                      | < 24 kg/m <sup>2</sup>                                                                                                                                                      |
| Physical activity                    | ≥ 150 min/week moderate intensity or ≥ 75 min/week vigorous intensity or ≥ 150 min/week moderate + vigorous intensity                                                       |
| Healthy diet                         | Dietary score ≥3 (including the following 4 items: fruits and vegetables ≥ 4.5 cups/d; fish ≥198 g/wk; sweets/sugar-sweetened beverages ≤ 450 kcal/wk; soy protein ≥25 g/d. |
| Total cholesterol                    | < 200 mg/dL (untreated)                                                                                                                                                     |
| Blood pressure                       | < 120/80 mm Hg (untreated)                                                                                                                                                  |

<sup>a</sup> Definitions were adapted from the recommendations of the Goals and Metrics Committee of the Strategic Planning Task Force of the American Heart Association.

Reference:

1. Lloyd-Jones DM, Hong Y, Labarthe D, et al; American Heart Association Strategic Planning Task Force and Statistics Committee. Defining and setting national goals for cardiovascular health promotion and disease reduction: the American Heart Association's strategic Impact Goal through 2020 and beyond. *Circulation* 2010; 121:586-613.

Supplementary Table 2. RRs (95% CIs) for incident type 2 diabetes according to famine exposure in early life among 77925 participants by age-balanced analysis.

|                                                                                                                                                                                                                                                                                                                                                                                                            | <b>Pre-famine and post-famine</b> | <b>Famine Exposure</b>  |
|------------------------------------------------------------------------------------------------------------------------------------------------------------------------------------------------------------------------------------------------------------------------------------------------------------------------------------------------------------------------------------------------------------|-----------------------------------|-------------------------|
| Case/Number                                                                                                                                                                                                                                                                                                                                                                                                | 4050/ 64730                       | 792/13195               |
| %                                                                                                                                                                                                                                                                                                                                                                                                          | 6.26                              | 6.00                    |
| Model 1                                                                                                                                                                                                                                                                                                                                                                                                    | 1.00 (ref)                        | 0.96 (0.89-1.03)        |
| Model 2                                                                                                                                                                                                                                                                                                                                                                                                    | 1.00 (ref)                        | <b>1.11 (1.03-1.20)</b> |
| Model 3                                                                                                                                                                                                                                                                                                                                                                                                    | 1.00 (ref)                        | <b>1.14 (1.05-1.23)</b> |
| Model 4                                                                                                                                                                                                                                                                                                                                                                                                    | 1.00 (ref)                        | <b>1.11 (1.03-1.19)</b> |
| <p>Model 1 was unadjusted; Model 2 was adjusted for age and sex; Model 3 included model 2 plus education attainment (less than high school or high school or greater), drinking status (current drinker or not) and family history of diabetes (yes or no). Model 4 included model 3 plus individual cardiovascular health metrics. RRs, risk ratios; CIs, confidence intervals; BMI, body mass index.</p> |                                   |                         |

| Supplementary Table 3. Multivariable-adjusted RRs (95% CIs) for incident type 2 diabetes according to famine exposure and combined ICVHMs                                                                                                            |                   |             |                        |                        |                   |
|------------------------------------------------------------------------------------------------------------------------------------------------------------------------------------------------------------------------------------------------------|-------------------|-------------|------------------------|------------------------|-------------------|
|                                                                                                                                                                                                                                                      | Case/n (%)        | Non-exposed | Famine Exposure        |                        | P for interaction |
|                                                                                                                                                                                                                                                      |                   |             | Fetal                  | Childhood              |                   |
| <b>Diet pattern</b>                                                                                                                                                                                                                                  |                   |             |                        |                        | 0.4357            |
| Non-ideal                                                                                                                                                                                                                                            | 2219/33651 (6.59) | 1.00 (ref)  | <b>1.32, 1.12-1.55</b> | <b>1.26, 1.00-1.57</b> |                   |
| Ideal                                                                                                                                                                                                                                                | 2623/44274 (5.92) | 1.00 (ref)  | 1.09, 0.94-1.26        | 0.99, 0.80-1.22        |                   |
| <b>Physical activity</b>                                                                                                                                                                                                                             |                   |             |                        |                        | 0.7508            |
| Non-ideal                                                                                                                                                                                                                                            | 4181/66912 (6.25) | 1.00 (ref)  | <b>1.18, 1.05-1.32</b> | 1.05, 0.89-1.24        |                   |
| Ideal                                                                                                                                                                                                                                                | 661/11013 (6.00)  | 1.00 (ref)  | 1.27, 0.92-1.75        | 1.51, 0.99-2.31        |                   |
| <b>Smoking Status</b>                                                                                                                                                                                                                                |                   |             |                        |                        | <b>0.0013</b>     |
| Non-ideal                                                                                                                                                                                                                                            | 1110/15836 (7.01) | 1.00 (ref)  | <b>1.26, 1.01-1.57</b> | 0.99, 0.72-1.37        |                   |
| Ideal                                                                                                                                                                                                                                                | 3732/62089 (6.01) | 1.00 (ref)  | <b>1.17, 1.03-1.33</b> | 1.14, 0.96-1.36        |                   |
| <b>BMI</b>                                                                                                                                                                                                                                           |                   |             |                        |                        | <b>0.0003</b>     |
| Non-ideal                                                                                                                                                                                                                                            | 3307/40399 (8.19) | 1.00 (ref)  | <b>1.21, 1.06-1.38</b> | 1.10, 0.92-1.32        |                   |
| Ideal                                                                                                                                                                                                                                                | 1535/37526 (4.09) | 1.00 (ref)  | 1.12, 0.91-1.37        | 1.18, 0.89-1.56        |                   |
| <b>TC</b>                                                                                                                                                                                                                                            |                   |             |                        |                        | 0.1854            |
| Non-ideal                                                                                                                                                                                                                                            | 2222/30799 (7.21) | 1.00 (ref)  | 1.14, 0.96-1.36        | 1.14, 0.91-1.43        |                   |
| Ideal                                                                                                                                                                                                                                                | 2620/47126 (5.56) | 1.00 (ref)  | <b>1.18, 1.02-1.36</b> | 1.03, 0.83-1.26        |                   |
| <b>BP</b>                                                                                                                                                                                                                                            |                   |             |                        |                        | 0.8310            |
| Non-ideal                                                                                                                                                                                                                                            | 3920/53046 (7.39) | 1.00 (ref)  | <b>1.23, 1.08-1.39</b> | 1.17, 0.99-1.39        |                   |
| Ideal                                                                                                                                                                                                                                                | 922/24879 (3.71)  | 1.00 (ref)  | 0.99, 0.78-1.25        | 0.86, 0.60-1.22        |                   |
| <b>Number of ICVHMs</b>                                                                                                                                                                                                                              |                   |             |                        |                        | <b>0.0005</b>     |
| ≤1                                                                                                                                                                                                                                                   | 947/9703 (9.76)   | 1.00 (ref)  | <b>1.62, 1.24-2.11</b> | 1.30, 0.90-1.88        |                   |
| 2                                                                                                                                                                                                                                                    | 1553/19978 (7.77) | 1.00 (ref)  | 1.02, 0.83-1.24        | 0.97, 0.74-1.27        |                   |
| 3                                                                                                                                                                                                                                                    | 1452/23598 (6.15) | 1.00 (ref)  | 1.01, 0.83-1.23        | 1.06, 0.81-1.39        |                   |
| 4                                                                                                                                                                                                                                                    | 658/16579 (3.97)  | 1.00 (ref)  | 1.24, 0.94-1.64        | 1.31, 0.89-1.94        |                   |
| ≥5                                                                                                                                                                                                                                                   | 232/8067 (2.88)   | 1.00 (ref)  | 0.93, 0.60-1.43        | 0.64, 0.34-1.22        |                   |
|                                                                                                                                                                                                                                                      |                   |             |                        |                        |                   |
| Adjusted for age, sex, education attainment (less than high school or high school or greater), drinking status (current drinker or not) and family history of diabetes (yes or no). BMI, body mass index; TC, total cholesterol; BP, blood pressure. |                   |             |                        |                        |                   |

**Supplementary Table 4. Multivariable-adjusted RRs (95% CIs) for incident type 2 diabetes according to famine exposure and combined ICVHMs by multiple testing via FDR**

|                          | Case/n     | Cumulative Incidence, % | Non-exposed | Fetal famine Exposure   |          | Childhood famine Exposure |         | P interaction |
|--------------------------|------------|-------------------------|-------------|-------------------------|----------|---------------------------|---------|---------------|
|                          |            |                         |             | RR (95%CI)              | P value  | RR (95%CI)                | P value |               |
| <b>Diet pattern</b>      |            |                         |             |                         |          |                           |         | 0.5392        |
| Non-ideal                | 2219/33651 | 6.59                    | 1.00 (ref)  | <b>1.29 (1.10-1.52)</b> | 0.0017** | <b>1.25 (1.00-1.56)</b>   | 0.0499  |               |
| Ideal                    | 2623/44274 | 5.92                    | 1.00 (ref)  | 1.07 (0.93-1.25)        | 0.3486   | 1.01 (0.82-1.25)          | 0.8933  |               |
| <b>Physical activity</b> |            |                         |             |                         |          |                           |         | 0.5766        |
| Non-ideal                | 4181/66912 | 6.25                    | 1.00 (ref)  | <b>1.16 (1.03-1.30)</b> | 0.0140*  | 1.06 (0.90-1.25)          | 0.4526  |               |
| Ideal                    | 661/11013  | 6.00                    | 1.00 (ref)  | 1.25 (0.91-1.72)        | 0.1729   | 1.52 (0.996-2.31)         | 0.0523  |               |
| <b>Smoking Status</b>    |            |                         |             |                         |          |                           |         | 0.0621        |
| Non-ideal                | 1110/15836 | 7.01                    | 1.00 (ref)  | <b>1.28 (1.02-1.59)</b> | 0.0296   | 1.03 (0.75-1.42)          | 0.8482  |               |
| Ideal                    | 3732/62089 | 6.01                    | 1.00 (ref)  | <b>1.14 (1.01-1.30)</b> | 0.0384   | 1.14 (0.96-1.36)          | 0.1272  |               |
| <b>BMI</b>               |            |                         |             |                         |          |                           |         | 0.0018**      |
| Non-ideal                | 3307/40399 | 8.19                    | 1.00 (ref)  | <b>1.20 (1.05-1.36)</b> | 0.0063*  | 1.09 (0.91-1.31)          | 0.3381  |               |
| Ideal                    | 1535/37526 | 4.09                    | 1.00 (ref)  | 1.10 (0.90-1.35)        | 0.3614   | 1.17 (0.88-1.54)          | 0.2768  |               |
| <b>TC</b>                |            |                         |             |                         |          |                           |         | 0.4103        |
| Non-ideal                | 2222/30799 | 7.21                    | 1.00 (ref)  | 1.15 (0.97-1.37)        | 0.0980   | 1.17 (0.93-1.46)          | 0.1770  |               |
| Ideal                    | 2620/47126 | 5.56                    | 1.00 (ref)  | <b>1.17 (1.01-1.35)</b> | 0.0358   | 1.06 (0.86-1.30)          | 0.5808  |               |
| <b>BP</b>                |            |                         |             |                         |          |                           |         | 0.9710        |
| Non-ideal                | 3920/53046 | 7.39                    | 1.00 (ref)  | <b>1.22 (1.08-1.38)</b> | 0.0015** | 1.18 (1.00-1.40)          | 0.0517  |               |
| Ideal                    | 922/24879  | 3.71                    | 1.00 (ref)  | 0.97 (0.76-1.23)        | 0.7946   | 0.87 (0.61-1.23)          | 0.4318  |               |
| <b>Number of ICVHMs</b>  |            |                         |             |                         |          |                           |         | 0.0005**      |
| ≤1                       | 947/9703   | 9.76                    | 1.00 (ref)  | <b>1.59 (1.24-2.04)</b> | 0.0003** | 1.28 (0.90-1.80)          | 0.1659  |               |
| 2                        | 1553/19978 | 7.77                    | 1.00 (ref)  | 1.03 (0.85-1.26)        | 0.7533   | 1.02 (0.78-1.33)          | 0.8933  |               |
| 3                        | 1452/23598 | 6.15                    | 1.00 (ref)  | 1.00 (0.83-1.22)        | 0.9656   | 1.01 (0.77-1.32)          | 0.9552  |               |
| 4                        | 658/16579  | 3.97                    | 1.00 (ref)  | 1.14 (0.84-1.55)        | 0.3949   | 1.26 (0.82-1.93)          | 0.3000  |               |
| ≥5                       | 232/8067   | 2.88                    | 1.00 (ref)  | 1.09 (0.67-1.78)        | 0.7147   | 0.79 (0.39-1.60)          | 0.5070  |               |

Adjusted for age, sex, education attainment (less than high school or high school or greater), drinking status (current drinker or not) and family history of diabetes (yes or no). Individual cardiovascular health metrics were mutually adjusted. RRs, risk ratios; CIs, confidence intervals; BMI, body mass index; TC, total cholesterol; BP, blood pressure; ICVHMs, ideal cardiovascular health metrics. \* FDR < 0.05; \*\* FDR <0.01

**Supplementary Table 5. Multivariable-adjusted ORs (95% CIs) for type 2 diabetes according to famine exposure and combined ICVHMs with further adjustment of area (rural/urban), marriage status, occupation, economic status.**

|                          | Case/n     | Non-exposed | Famine Exposure        |                  | P for interaction |
|--------------------------|------------|-------------|------------------------|------------------|-------------------|
|                          |            |             | Fetal                  | Childhood        |                   |
| <b>Diet pattern</b>      |            |             |                        |                  | 0.5334            |
| Non-ideal                | 2219/33651 | 1.00 (ref)  | <b>1.26, 1.07-1.48</b> | 1.21, 0.97-1.51  |                   |
| Ideal                    | 2623/44274 | 1.00 (ref)  | 1.06, 0.91-1.23        | 1.01, 0.82-1.24  |                   |
| <b>Physical activity</b> |            |             |                        |                  | 0.5256            |
| Non-ideal                | 4181/66912 | 1.00 (ref)  | <b>1.14, 1.01-1.28</b> | 1.05, 0.89-1.24  |                   |
| Ideal                    | 661/11013  | 1.00 (ref)  | 1.23, 0.89-1.70        | 1.52, 0.997-2.31 |                   |
| <b>Smoking Status</b>    |            |             |                        |                  | 0.0569            |
| Non-ideal                | 1110/15836 | 1.00 (ref)  | 1.22, 0.98-1.52        | 0.99, 0.72-1.36  |                   |
| Ideal                    | 3732/62089 | 1.00 (ref)  | 1.13, 0.997-1.28       | 1.14, 0.96-1.35  |                   |
| <b>BMI</b>               |            |             |                        |                  | <b>0.0018</b>     |
| Non-ideal                | 3307/40399 | 1.00 (ref)  | <b>1.18, 1.03-1.34</b> | 1.08, 0.90-1.29  |                   |
| Ideal                    | 1535/37526 | 1.00 (ref)  | 1.08, 0.88-1.33        | 1.16, 0.88-1.53  |                   |
| <b>TC</b>                |            |             |                        |                  | 0.3412            |
| Non-ideal                | 2222/30799 | 1.00 (ref)  | 1.14, 0.96-1.35        | 1.15, 0.92-1.44  |                   |
| Ideal                    | 2620/47126 | 1.00 (ref)  | 1.15, 0.99-1.32        | 1.05, 0.85-1.29  |                   |
| <b>BP</b>                |            |             |                        |                  | 0.8845            |
| Non-ideal                | 3920/53046 | 1.00 (ref)  | <b>1.20, 1.06-1.35</b> | 1.16, 0.98-1.37  |                   |
| Ideal                    | 922/24879  | 1.00 (ref)  | 0.97, 0.76-1.23        | 0.87, 0.62-1.24  |                   |
| <b>Number of ICVHMs</b>  |            |             |                        |                  | <b>0.0003</b>     |
| ≤1                       | 947/9703   | 1.00 (ref)  | <b>1.51, 1.18-1.94</b> | 1.20, 0.85-1.69  |                   |
| 2                        | 1553/19978 | 1.00 (ref)  | 1.01, 0.83-1.23        | 1.00, 0.76-1.30  |                   |
| 3                        | 1452/23598 | 1.00 (ref)  | 0.99, 0.81-1.21        | 1.00, 0.76-1.30  |                   |
| 4                        | 658/16579  | 1.00 (ref)  | 1.13, 0.84-1.54        | 1.27, 0.83-1.95  |                   |
| ≥5                       | 232/8067   | 1.00 (ref)  | 1.07, 0.66-1.74        | 0.78, 0.39-1.59  |                   |

Adjusted for age, sex, education attainment (less than high school or high school or greater), drinking status (current drinker or not) and family history of diabetes (yes or no), area (rural/urban), marriage status, occupation, economic status. Individual cardiovascular health metrics were mutually adjusted. ORs, odds ratios; CIs, confidence intervals; BMI, body mass index; TC, total cholesterol; BP, blood pressure; ICVHMs, ideal cardiovascular health metrics.

| Supplementary Table 6. Age-balanced analysis of the ICVHMs' influence on famine exposure and diabetes risk.                                                                                                                                                                                                                                                                                                     |            |                         |                                 |                        |               |
|-----------------------------------------------------------------------------------------------------------------------------------------------------------------------------------------------------------------------------------------------------------------------------------------------------------------------------------------------------------------------------------------------------------------|------------|-------------------------|---------------------------------|------------------------|---------------|
|                                                                                                                                                                                                                                                                                                                                                                                                                 | Case/n     | Cumulative Incidence, % | Non-exposed + childhood-exposed | Fetal-exposed          | P interaction |
| <b>Diet pattern</b>                                                                                                                                                                                                                                                                                                                                                                                             |            |                         |                                 |                        | 0.1231        |
| Non-ideal                                                                                                                                                                                                                                                                                                                                                                                                       | 2219/33651 | 6.59                    | 1.00 (ref)                      | <b>1.16, 1.03-1.29</b> |               |
| Ideal                                                                                                                                                                                                                                                                                                                                                                                                           | 2623/44274 | 5.92                    | 1.00 (ref)                      | 1.07, 0.96-1.18        |               |
| <b>Physical activity</b>                                                                                                                                                                                                                                                                                                                                                                                        |            |                         |                                 |                        | 0.2527        |
| Non-ideal                                                                                                                                                                                                                                                                                                                                                                                                       | 4181/66912 | 6.25                    | 1.00 (ref)                      | <b>1.12, 1.03-1.22</b> |               |
| Ideal                                                                                                                                                                                                                                                                                                                                                                                                           | 661/11013  | 6.00                    | 1.00 (ref)                      | 1.00, 0.80-1.25        |               |
| <b>Smoking Status</b>                                                                                                                                                                                                                                                                                                                                                                                           |            |                         |                                 |                        | <b>0.0165</b> |
| Non-ideal                                                                                                                                                                                                                                                                                                                                                                                                       | 1110/15836 | 7.01                    | 1.00 (ref)                      | <b>1.26, 1.08-1.46</b> |               |
| Ideal                                                                                                                                                                                                                                                                                                                                                                                                           | 3732/62089 | 6.01                    | 1.00 (ref)                      | 1.07, 0.98-1.17        |               |
| <b>BMI</b>                                                                                                                                                                                                                                                                                                                                                                                                      |            |                         |                                 |                        | <b>0.0320</b> |
| Non-ideal                                                                                                                                                                                                                                                                                                                                                                                                       | 3307/40399 | 8.19                    | 1.00 (ref)                      | <b>1.15, 1.05-1.25</b> |               |
| Ideal                                                                                                                                                                                                                                                                                                                                                                                                           | 1535/37526 | 4.09                    | 1.00 (ref)                      | 1.01, 0.88-1.17        |               |
| <b>TC</b>                                                                                                                                                                                                                                                                                                                                                                                                       |            |                         |                                 |                        | 0.8370        |
| Non-ideal                                                                                                                                                                                                                                                                                                                                                                                                       | 2222/30799 | 7.21                    | 1.00 (ref)                      | 1.06, 0.95-1.19        |               |
| Ideal                                                                                                                                                                                                                                                                                                                                                                                                           | 2620/47126 | 5.56                    | 1.00 (ref)                      | <b>1.13, 1.02-1.26</b> |               |
| <b>BP</b>                                                                                                                                                                                                                                                                                                                                                                                                       |            |                         |                                 |                        | 0.5756        |
| Non-ideal                                                                                                                                                                                                                                                                                                                                                                                                       | 3920/53046 | 7.39                    | 1.00 (ref)                      | <b>1.12, 1.03-1.22</b> |               |
| Ideal                                                                                                                                                                                                                                                                                                                                                                                                           | 922/24879  | 3.71                    | 1.00 (ref)                      | 1.04, 0.88-1.23        |               |
| <b>Number of ICVHMs</b>                                                                                                                                                                                                                                                                                                                                                                                         |            |                         |                                 |                        | <b>0.0041</b> |
| ≤1                                                                                                                                                                                                                                                                                                                                                                                                              | 947/9703   | 9.76                    | 1.00 (ref)                      | <b>1.40, 1.19-1.65</b> |               |
| 2                                                                                                                                                                                                                                                                                                                                                                                                               | 1553/19978 | 7.77                    | 1.00 (ref)                      | 1.02, 0.89-1.18        |               |
| 3                                                                                                                                                                                                                                                                                                                                                                                                               | 1452/23598 | 6.15                    | 1.00 (ref)                      | 1.00, 0.87-1.15        |               |
| 4                                                                                                                                                                                                                                                                                                                                                                                                               | 658/16579  | 3.97                    | 1.00 (ref)                      | 1.02, 0.82-1.25        |               |
| ≥5                                                                                                                                                                                                                                                                                                                                                                                                              | 232/8067   | 2.88                    | 1.00 (ref)                      | 1.24, 0.88-1.74        |               |
| Adjusted for age, sex, education attainment (less than high school or high school or greater), drinking status (current drinker or not) and family history of diabetes (yes or no). Individual cardiovascular health metrics were mutually adjusted. RRs, risk ratios; CIs, confidence intervals; BMI, body mass index; TC, total cholesterol; BP, blood pressure; ICVHMs, ideal cardiovascular health metrics. |            |                         |                                 |                        |               |
